# Supplementary material for: Supporting Correct Antimicrobial Choices in Sepsis
Source: MDPI journal article supplement (doi:10.3390/msf2022015005), 2023-03-24
Supplement: s1 [file s1]

## Supporting CORRECT Antimicrobial CHOICES IN SEPSIS

A nomination of Dr Alexander Pond-Allerton (FY2 Doctor) for the Das Pillay Antimicrobial Stewardship Memorial Award  
Submitted by Bal Bolla Consultant Antimicrobial Pharmacists for ULHT in recognition of the dedication and commitment to Antimicrobial Stewardship and patient outcomes.

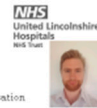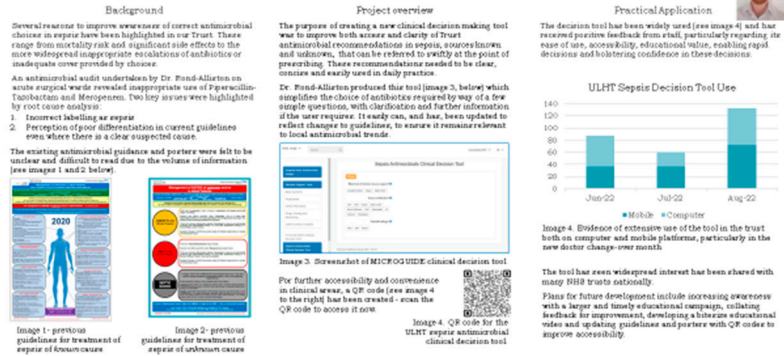

Figure S1. Poster overview of the project.

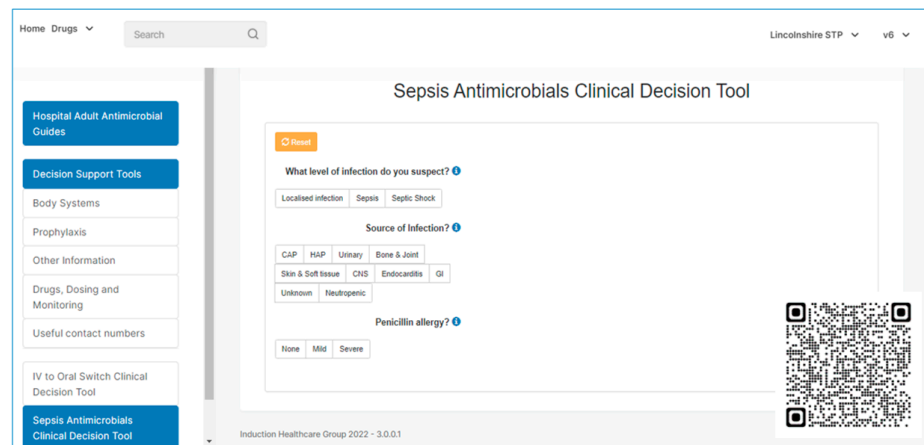

Figure S2. Screenshot of the tool itself, as viewed by a user. Note also the QR code in the bottom-right-hand corner to view the current version directly.

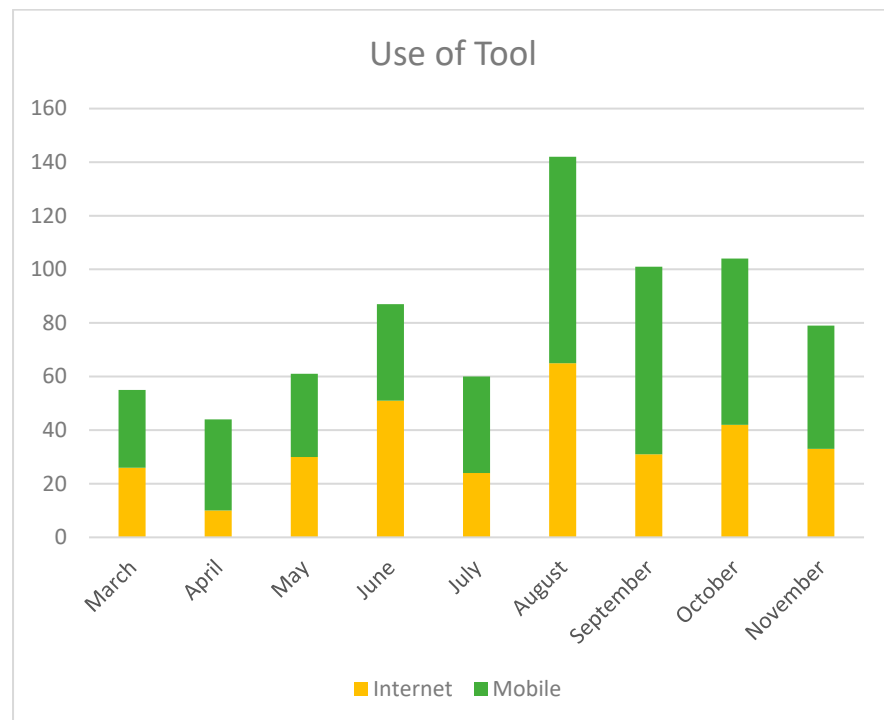

**Figure S3.** Graph depicting the use of the tool in 2022 so far. Updated since poster submission for accuracy.

- Airedale NHS Foundation Trust
- Barts Health NHS trust
- Bedford Hospital NHS Foundation Trust
- Children's University Hospital, Dublin
- Dartford & Gravesham NHS Trust
- East & North Hertfordshire NHS Trust
- GGC Inverclyde Royal Hospital
- Gloucestershire Hospitals NHS Foundation Trust
- Kettering General Hospital NHS Trust
- Kings College NHS Foundation Trust
- Lewisham and Greenwich NHS Trust
- North Bristol NHS Trust
- Royal Marsden NHS Foundation Trust
- Royal United Hospitals Bath NHS Foundation Trust
- Royal Wolverhampton NHS Trust
- The Robert Jones & Agnes Hunt Orthopaedic Hospital NHS Foundation Trust
- University College London NHS Foundation Trust
- University Hospitals Birmingham NHS Foundation Trust
- University Hospitals Bristol & Weston NHS Foundation Trust

**Figure S4.** List of hospitals and NHS Trusts that the tool has been shared with.

**Table S1.** Overview of pre- and post-intervention audit data.

| Observations from audit                     | Pre-intervention compliance<br>2021 (n = 54) | Post-intervention compliance<br>2022 (n = 48) |
|---------------------------------------------|----------------------------------------------|-----------------------------------------------|
| Clearly documented clinical indication      | 78%                                          | 83%                                           |
| Appropriate choice of antimicrobial         | 70%                                          | 71%                                           |
| Allergy status taken into account correctly | 96%                                          | 98%                                           |
